# Supplementary material for: Evaluation of osteochondral-like tissues using human freeze-dried cancellous bone and chondrocyte sheets to treat osteochondral defects in rabbits
Source: Royal Society of Chemistry journal article supplement (doi:10.1039/d1bm00239b), 2021-01-01
Supplement: d1bm00239b1.pdf [file d1bm00239b1.pdf]

**Supplement Table S1.** ICRS scoring system used for macroscopic evaluation in transplantation groups A and B at 4, 8, and 12 weeks. ICRS, International Cartilage Repair Society.

| <b>Categories for transplantation group A</b>                                                                                                                                                                                                                                                                                                                                                                                                                                                                                                                                                                                                                                                                                                                                                                                                                                                                                                                                                                                                   | <b>Categories for transplantation group B</b>                                                                                                                                                                                                                                                                                     |
|-------------------------------------------------------------------------------------------------------------------------------------------------------------------------------------------------------------------------------------------------------------------------------------------------------------------------------------------------------------------------------------------------------------------------------------------------------------------------------------------------------------------------------------------------------------------------------------------------------------------------------------------------------------------------------------------------------------------------------------------------------------------------------------------------------------------------------------------------------------------------------------------------------------------------------------------------------------------------------------------------------------------------------------------------|-----------------------------------------------------------------------------------------------------------------------------------------------------------------------------------------------------------------------------------------------------------------------------------------------------------------------------------|
| <p><b>Degree of defect repair</b></p> <p><b>4:</b> In level with surrounding cartilage</p> <p><b>3:</b> 75% repair of defect depth</p> <p><b>2:</b> 50% repair of defect depth</p> <p><b>2:</b> 25% repair of defect depth</p> <p><b>0:</b> No repair of defect depth</p>                                                                                                                                                                                                                                                                                                                                                                                                                                                                                                                                                                                                                                                                                                                                                                       | <p><b>Degree of defect repair</b></p> <p><b>4:</b> 100% survival of initially grafted surface</p> <p><b>3:</b> 75% survival of initially grafted surface</p> <p><b>2:</b> 50% survival of initially grafted surface</p> <p><b>1:</b> 25% survival of initially grafted surface</p> <p><b>0:</b> 0% (plugs are lost or broken)</p> |
| <p><b>Integration to border zone</b></p> <p><b>4:</b> Complete integration with surrounding cartilage</p> <p><b>3:</b> Demarcating border &lt; 1 mm</p> <p><b>2:</b> <math>\frac{3}{4}</math> of graft integrated, <math>\frac{1}{4}</math> with a notable border &gt; 1 mm width</p> <p><b>1:</b> <math>\frac{1}{2}</math> of graft integrated with surrounding cartilage, <math>\frac{1}{2}</math> with a notable border &gt; 1 mm</p> <p><b>0:</b> From no contact to <math>\frac{1}{4}</math> of graft integrated with surrounding cartilage</p> <p><b>Macroscopic appearance</b></p> <p><b>4:</b> Intact smooth surface</p> <p><b>3:</b> Fibrillated surface</p> <p><b>2:</b> Small, scattered fissures or cracks</p> <p><b>1:</b> Several small or few large fissures</p> <p><b>0:</b> Total degeneration of grafted area</p> <p><b>Overall repair assessment</b></p> <p><b>12:</b> Grade I: normal</p> <p><b>8-11:</b> Grade II: nearly normal</p> <p><b>4-7:</b> Grade III: abnormal</p> <p><b>1-3:</b> Grade IV: severely abnormal</p> |                                                                                                                                                                                                                                                                                                                                   |

**Supplement Table S2.** Eleven items in the modified ICRS scoring system used for microscopic evaluation in transplantation groups A and B at 4, 8, and 12 weeks. ICRS, International Cartilage Repair Society.

| <b>Cartilage evaluation<br/>(Maximum total 30 points)</b>                                                                           | <b>Subchondral bone evaluation<br/>(Maximum total 10 points)</b>                                    | <b>Inflammation evaluation<br/>(Maximum total 5 points)</b>                                                                                                               |
|-------------------------------------------------------------------------------------------------------------------------------------|-----------------------------------------------------------------------------------------------------|---------------------------------------------------------------------------------------------------------------------------------------------------------------------------|
| <b>Tissue morphology</b><br><b>4:</b> mostly hyaline cartilage<br><b>3:</b> mostly fibrocartilage<br><b>2:</b> mostly non-cartilage | <b>Subchondral bone formation</b><br><b>3:</b> strong<br><b>2:</b> slight<br><b>1:</b> no formation | <b>5:</b> strong inflammation<br><ul style="list-style-type: none"> <li>• Abundant infiltration of inflammatory cells including lymphocytes, plasma cells, and</li> </ul> |

---

1: exclusively non-cartilage

**Matrix staining**

- 4: strong
- 3: moderate
- 2: slight
- 1: none

**Structural integrity**

- 5: normal, similar to healthy mature cartilage
- 4: beginning of columnar organization of chondrocytes
- 3: no organization of chondrocytes
- 2: cysts or disruptions
- 1: severe disintegration

**Chondrocyte clustering in implant**

- 3: no clusters
- 2: <25% of the cells clustered
- 1: 25-100% of the cells clustered

**Histologic appraisal defect filling**

- 5: 91-110%
- 4: 76-90%
- 3: 51-75%
- 2: 26-50%
- 1: <25%

**Histologic appraisal of surface architecture**

- 4: normal
- 3: slight fibrillation or irregularity
- 2: moderate fibrillation or irregularity
- 1: severe fibrillation or disruption

**Intactness of the calcified cartilage layer, formation of tidemark**

- 5: complete intactness of the calcified cartilage layer
- 4: 76-90% of the calcified cartilage layer intact
- 3: 50-75% of the calcified cartilage layer intact
- 2: 25-49% of the calcified cartilage layer intact
- 1: <25% of the calcified cartilage layer intact

**Lateral integration of implanted material**

- 3: bonded at both sides
- 2: bonded at one end/partially both ends
- 1: not bonded

**Basal integration of implanted material**

- 4: 91-100%
- 3: 70-90%
- 2: 50-70%
- 1: <50%

macrophages)

• Abundant formation of fibroplasia

3: slight inflammation

• Mild to moderate infiltration of inflammatory cells including lymphocytes, plasma cells, and macrophages)

• Mild to moderate formation of fibroplasia

1: no inflammation

**Supplement Table S3.** List of the proteins concerning cellular response to cytokine stimulus [GO:0071345], cytokine mediated signaling pathway [GO:0019221], and response to cytokine [GO:0034097] found in the chondrocyte sheet, chondrocyte sheet-cancellous bone, and cancellous bone. Red boxes highlight the LAMA-5 and FN in the tissues, which were classified not only in the protein binding and ECM-receptor interaction, but also in the cytokine-mediated signaling pathway. LAMA-5, laminin subunit alpha-5; FN, fibronectin.

| No. | Accession number | Protein names                                                                  | Cellular response to cytokine stimulus (GO:0071345), cytokine-mediated signaling pathway (GO:0019221), and response to cytokine (GO:0034097) | Q-value | Log 2 expression  |                                          |                 |
|-----|------------------|--------------------------------------------------------------------------------|----------------------------------------------------------------------------------------------------------------------------------------------|---------|-------------------|------------------------------------------|-----------------|
|     |                  |                                                                                |                                                                                                                                              |         | Chondrocyte sheet | Chondrocyte sheet-cancellous bone tissue | Cancellous bone |
| 1   | Q9Y4K3           | TNF receptor-associated factor 6                                               | GO:0071345                                                                                                                                   | 0.9929  | 19.8489           | 12.6466                                  | 0               |
| 2   | O15230           | Laminin subunit alpha-5                                                        | GO:0019221                                                                                                                                   | 0.9942  | 16.5343           | 12.4866                                  | 0               |
| 3   | Q14114           | Low-density lipoprotein receptor-related protein 8                             | GO:0019221                                                                                                                                   | 0.9904  | 15.2063           | 14.0799                                  | 0               |
| 4   | P02751           | Fibronectin                                                                    | GO:0019221                                                                                                                                   | 0.9939  | 14.1051           | 14.0951                                  | 0               |
| 5   | P42336           | Phosphatidylinositol 4,5-bisphosphate 3-kinase catalytic subunit alpha isoform | GO:0019221                                                                                                                                   | 0.9880  | 13.1915           | 15.7668                                  | 0               |
| 6   | Q8WU90           | Zinc finger CCCH domain-containing protein 15                                  | GO:0019221                                                                                                                                   | 0.9881  | 12.9350           | 12.4067                                  | 0               |
| 7   | P42680           | Tyrosine-protein kinase Tec                                                    | GO:0019221                                                                                                                                   | 0.9906  | 12.2026           | 16.4694                                  | 0               |
| 8   | P37275           | Zinc finger E-box-binding homeobox 1                                           | GO:0019221                                                                                                                                   | 0.9946  | 0                 | 14.7078                                  | 0               |
| 9   | Q8TD23           | Zinc finger protein 675                                                        | GO:0019221                                                                                                                                   | 0.9852  | 0                 | 13.7291                                  | 0               |
| 10  | P35398           | Nuclear receptor ROR-alpha                                                     | GO:0019221                                                                                                                                   | 0.9969  | 0                 | 11.9960                                  | 0               |
| 11  | P01730           | T-cell surface glycoprotein CD4                                                | GO:0019221                                                                                                                                   | 0.9902  | 0                 | 11.5651                                  | 0               |
| 12  | P52333           | Tyrosine-protein kinase JAK3                                                   | GO:0019221                                                                                                                                   | 0.9953  | 0                 | 0                                        | 17.8665         |
| 13  | P35625           | Metalloproteinase inhibitor 3                                                  | GO:0034097                                                                                                                                   | 0.9883  | 16.4403           | 0                                        | 0               |
| 14  | P23497           | Nuclear autoantigen Sp-100                                                     | GO:0034097                                                                                                                                   | 0.9888  | 14.3493           | 0                                        | 12.6722         |
| 15  | P52945           | Pancreas/duodenum homeobox protein 1                                           | GO:0034097                                                                                                                                   | 0.9825  | 13.6451           | 14.4991                                  | 0               |
| 16  | P16035           | Metalloproteinase inhibitor 2                                                  | GO:0034097                                                                                                                                   | 0.9959  | 10.6711           | 0                                        | 0               |
| 17  | Q8N9M5           | Transmembrane protein 102                                                      | GO:0034097                                                                                                                                   | 1.0178  | 0                 | 13.9825                                  | 0               |

**Supplement Table S4.** List of proteins concerning cellular response to cytokine stimulus [GO:0071345], cytokine mediated signaling pathway [GO:0019221], and response to cytokine [GO:0034097] found in the culture media of chondrocyte sheet, chondrocyte sheet-cancellous bone, and cancellous bone. The LAMA-5 and FN were found in the culture media of the chondrocyte sheets and chondrocyte sheet-cancellous bone tissues (red boxes). LAMA-5, laminin subunit alpha-5; FN, fibronectin.

| No. | Accession number | Protein names                                            | Cellular response to cytokine stimulus (GO:0071345), cytokine-mediated signaling pathway (GO:0019221), and response to cytokine (GO:0034097) | Q-value | Log 2 expression       |                                               |                      |
|-----|------------------|----------------------------------------------------------|----------------------------------------------------------------------------------------------------------------------------------------------|---------|------------------------|-----------------------------------------------|----------------------|
|     |                  |                                                          |                                                                                                                                              |         | DMEM Chondrocyte sheet | DMEM Chondrocyte sheet-cancellous bone tissue | DMEM Cancellous bone |
| 1   | Q13023           | A-kinase anchor protein 6                                | GO:0071345                                                                                                                                   | 0.9918  | 12.9604                | 16.2673                                       | 0                    |
| 2   | P08473           | Neprilysin                                               | GO:0071345                                                                                                                                   | 0.9935  | 0                      | 12.0999                                       | 0                    |
| 3   | Q6IA17           | Single Ig IL-1-related receptor                          | GO:0071345                                                                                                                                   | 1.0190  | 0                      | 11.1180                                       | 0                    |
| 4   | O00165           | HCLS1-associated protein X-1                             | GO:0071345                                                                                                                                   | 0.9974  | 13.8992                | 0                                             | 14.6596              |
| 5   | Q12923           | Tyrosine-protein phosphatase non-receptor type 13        | GO:0071345                                                                                                                                   | 0.9825  | 13.6185                | 0                                             | 16.7059              |
| 6   | P17706           | Tyrosine-protein phosphatase non-receptor type 2         | GO:0071345                                                                                                                                   | 1.0034  | 0                      | 0                                             | 16.0414              |
| 7   | P13612           | Integrin alpha-4                                         | GO:0071345                                                                                                                                   | 0.9826  | 0                      | 0                                             | 16.0504              |
| 8   | P29350           | Tyrosine-protein phosphatase non-receptor type 6         | GO:0071345 and GO:0019221                                                                                                                    | 0.9962  | 0                      | 12.0234                                       | 0                    |
| 9   | Q9HB29           | Interleukin-1 receptor-like 2                            | GO:0071345 and GO:0019221                                                                                                                    | 1.0221  | 0                      | 16.8606                                       | 0                    |
| 10  | P40763           | Signal transducer and activator of transcription 3       | GO:0071345 and GO:0019221                                                                                                                    | 1.0441  | 0                      | 0                                             | 12.0136              |
| 11  | O15230           | Laminin subunit alpha-5                                  | GO:0019221                                                                                                                                   | 0.9821  | 17.5407                | 18.859                                        | 17.5782              |
| 12  | P05556           | Integrin beta-1                                          | GO:0019221                                                                                                                                   | 0.9817  | 17.8410                | 17.8717                                       | 17.1544              |
| 13  | P08631           | Tyrosine-protein kinase HCK                              | GO:0019221                                                                                                                                   | 1.0128  | 17.6464                | 17.5099                                       | 13.6359              |
| 14  | Q14114           | Low-density lipoprotein receptor-related protein 8       | GO:0019221                                                                                                                                   | 0.9818  | 15.4949                | 17.2404                                       | 19.0126              |
| 15  | Q14627           | Interleukin-13 receptor subunit alpha-2                  | GO:0019221                                                                                                                                   | 1.0042  | 0                      | 17.1431                                       | 16.4826              |
| 16  | P21453           | Sphingosine 1-phosphate receptor 1                       | GO:0019221                                                                                                                                   | 0.9907  | 0                      | 17.0882                                       | 0                    |
| 17  | Q14765           | Signal transducer and activator of transcription 4       | GO:0019221                                                                                                                                   | 0.9645  | 0                      | 15.7638                                       | 0                    |
| 18  | P04083           | Annexin A1                                               | GO:0019221                                                                                                                                   | 1.0000  | 0                      | 15.1925                                       | 0                    |
| 19  | P05107           | Integrin beta-2                                          | GO:0019221                                                                                                                                   | 0.9835  | 0                      | 15.1590                                       | 0                    |
| 20  | Q07889           | Son of sevenless homolog 1                               | GO:0019221                                                                                                                                   | 1.0030  | 13.9824                | 15.0061                                       | 0                    |
| 21  | P02751           | Fibronectin                                              | GO:0019221                                                                                                                                   | 0.9855  | 13.3167                | 14.7549                                       | 0                    |
| 22  | O75159           | Suppressor of cytokine signaling 5                       | GO:0019221                                                                                                                                   | 0.9963  | 0                      | 14.3100                                       | 0                    |
| 23  | Q5VWK5           | Interleukin-23 receptor                                  | GO:0019221                                                                                                                                   | 1.0400  | 13.1289                | 13.8837                                       | 0                    |
| 24  | P37275           | Zinc finger E-box-binding homeobox 1                     | GO:0019221                                                                                                                                   | 1.0019  | 11.8304                | 12.5457                                       | 0                    |
| 25  | Q92835           | Phosphatidylinositol 3,4,5-trisphosphate 5-phosphatase 1 | GO:0019221                                                                                                                                   | 1.0040  | 13.6969                | 12.0852                                       | 12.9100              |
| 26  | Q16552           | Interleukin-17A                                          | GO:0019221                                                                                                                                   | 1.0244  | 17.1065                | 0                                             | 0                    |
| 27  | O60674           | Tyrosine-protein kinase JAK2                             | GO:0019221                                                                                                                                   | 0.9852  | 16.8789                | 0                                             | 0                    |
| 28  | Q9HC73           | Cytokine receptor-like factor 2                          | GO:0019221                                                                                                                                   | 0.9933  | 15.6275                | 0                                             | 0                    |
| 29  | P23458           | Tyrosine-protein kinase JAK1                             | GO:0019221                                                                                                                                   | 1.0402  | 15.4628                | 0                                             | 0                    |
| 30  | P42680           | Tyrosine-protein kinase Tec                              | GO:0019221                                                                                                                                   | 1.0276  | 14.6529                | 0                                             | 0                    |

| No. | Accession number | Protein names                                                                  | Cellular response to cytokine stimulus (GO:0071345), cytokine-mediated signaling pathway (GO:0019221), and response to cytokine (GO:0034097) | Q-value | Log 2 expression       |                                               |                      |
|-----|------------------|--------------------------------------------------------------------------------|----------------------------------------------------------------------------------------------------------------------------------------------|---------|------------------------|-----------------------------------------------|----------------------|
|     |                  |                                                                                |                                                                                                                                              |         | DMEM Chondrocyte sheet | DMEM Chondrocyte sheet-cancellous bone tissue | DMEM Cancellous bone |
| 31  | P23471           | Receptor-type tyrosine-protein phosphatase zeta                                | GO:0019221                                                                                                                                   | 0.9859  | 14.0740                | 0                                             | 14.5680              |
| 32  | P48551           | Interferon alpha/beta receptor 2                                               | GO:0019221                                                                                                                                   | 0.9844  | 13.7700                | 0                                             | 0                    |
| 33  | P38484           | Interferon gamma receptor 2                                                    | GO:0019221                                                                                                                                   | 1.0011  | 11.3369                | 0                                             | 0                    |
| 34  | P42226           | Signal transducer and activator of transcription 6                             | GO:0019221                                                                                                                                   | 1.0441  | 0                      | 0                                             | 11.6486              |
| 35  | P14625           | Endoplasmin                                                                    | GO:0019221                                                                                                                                   | 1.0019  | 0                      | 0                                             | 12.4980              |
| 36  | Q16658           | Fascin                                                                         | GO:0019221                                                                                                                                   | 0.9913  | 0                      | 0                                             | 13.3464              |
| 37  | O14944           | Proepiregulin                                                                  | GO:0019221                                                                                                                                   | 1.0038  | 0                      | 0                                             | 13.9311              |
| 38  | Q13007           | Interleukin-24                                                                 | GO:0019221                                                                                                                                   | 0.9869  | 0                      | 0                                             | 15.1562              |
| 39  | P01137           | Transforming growth factor beta-1 proprotein                                   | GO:0019221                                                                                                                                   | 0.9848  | 0                      | 0                                             | 18.4676              |
| 40  | P32246           | C-C chemokine receptor type 1                                                  | GO:0019221                                                                                                                                   | 0.9846  | 0                      | 0                                             | 18.7254              |
| 41  | Q16520           | Basic leucine zipper transcriptional factor ATF-like                           | GO:0019221                                                                                                                                   | 1.0035  | 0                      | 14.5143                                       | 0                    |
| 42  | Q9Y616           | Interleukin-1 receptor-associated kinase 3                                     | GO:0019221                                                                                                                                   | 0.9915  | 12.4758                | 0                                             | 17.8342              |
| 43  | P42336           | Phosphatidylinositol 4,5-bisphosphate 3-kinase catalytic subunit alpha isoform | GO:0019221                                                                                                                                   | 0.9945  | 13.6034                | 0                                             | 0                    |
| 44  | P25105           | Platelet-activating factor receptor                                            | GO:0019221                                                                                                                                   | 1.0442  | 0                      | 0                                             | 15.8739              |
| 45  | P42702           | Leukemia inhibitory factor receptor                                            | GO:0019221 and GO:0034097                                                                                                                    | 0.9535  | 0                      | 0                                             | 13.4722              |
| 46  | Q9Y6Q6           | Tumor necrosis factor receptor superfamily member 11A                          | GO:0034097                                                                                                                                   | 0.9871  | 0                      | 15.3405                                       | 0                    |
| 47  | P23497           | Nuclear autoantigen Sp-100                                                     | GO:0034097                                                                                                                                   | 0.9914  | 0                      | 14.5655                                       | 16.3609              |
| 48  | P30559           | Oxytocin receptor                                                              | GO:0034097                                                                                                                                   | 0.9865  | 16.8817                | 0                                             | 0                    |

**Supplement Table S5.** Hematological and biological markers in transplantation groups A and B at 0, 4, 8, and 12 weeks.

| Hematological parameters                               |                  |                  |                | Biochemical parameters         |                     |                     |                |
|--------------------------------------------------------|------------------|------------------|----------------|--------------------------------|---------------------|---------------------|----------------|
| 0 week                                                 | Group A (n = 12) | Group B (n = 12) | <i>p</i> value | 0 week                         | Group A (n = 12)    | Group B (n = 12)    | <i>p</i> value |
| WBC (5.2 – 12.5 × 10 <sup>3</sup> /mm <sup>3</sup> )   | 8.21 ± 2.49      | 7.97 ± 2.07      | 0.798          | BUN (20 - 45 mg/dL)            | 33.17 ± 4.11        | 30.33 ± 5.69        | 0.176          |
| Neutrophil (20 – 75 %)                                 | 51.67 ± 8.23     | 49.83 ± 8.90     | 0.606          | Creatinine (0.50 – 2.50 mg/dL) | 1.23 ± 0.27         | 1.15 ± 0.27         | 0.469          |
| Lymphocyte (30 – 85 %)                                 | 43.17 ± 8.42     | 44.83 ± 9.01     | 0.644          | Total protein (5.4 – 7.5 g/dL) | 6.68 ± 0.43         | 6.55 ± 0.40         | 0.442          |
| RBC (5.00 – 8.00 × 10 <sup>6</sup> cells/μL)           | 5.70 ± 0.54      | 6.01 ± 0.79      | 0.258          | Albumin (2.7 – 5.0 g/dL)       | 4.15 ± 0.24         | 3.97 ± 0.17         | 0.042          |
| Hb (10.0 – 17.0 g/dL)                                  | 11.68 ± 0.97     | 12.28 ± 0.96     | 0.138          | ALT(SGPT) (45 – 80 U/L)        | 59.83 ± 20.03       | 57.08 ± 14.20       | 0.702          |
| MCV (58.0 – 67.0 fl)                                   | 63.73 ± 2.31     | 63.29 ± 2.58     | 0.669          | AST(SGOT) (35 – 130 U/L)       | 29.92 ± 9.98        | 24.08 ± 8.04        | 0.129          |
| MCH (20.0 – 21.3 pg)                                   | 20.56 ± 1.20     | 20.57 ± 1.32     | 0.987          | ALK.phos (12 – 96 U/L)         | 81.92 ± 41.43       | 92.17 ± 46.42       | 0.574          |
| MCHC (29.0 – 37.0 g/dL)                                | 32.35 ± 1.31     | 32.48 ± 1.43     | 0.692          | CPK (140.0 – 372.0 U/L)        | 802.63 ± 283.01     | 886.77 ± 199.78     | 0.409          |
| Platelets (250 – 650 × 10 <sup>3</sup> /μL)            | 378.42 ± 134.71  | 405.25 ± 78.19   | 0.557          | CRP (< 3 mg/L)                 | 0.20 ± 0.03         | 0.20 ± 0.05         | 0.840          |
| 4 weeks                                                | Group A (n = 12) | Group B (n = 12) | <i>p</i> value | 4 weeks                        | Group A (n = 12)    | Group B (n = 12)    | <i>p</i> value |
| WBC (5.20 – 12.50 × 10 <sup>3</sup> /mm <sup>3</sup> ) | 7.68 ± 3.83      | 7.75 ± 2.88      | 0.957          | BUN (20 - 45 mg/dL)            | 21.67 ± 5.42        | 20.58 ± 3.90        | 0.579          |
| Neutrophil (20 – 75 %)                                 | 54.83 ± 9.90     | 54.58 ± 10.59    | 0.953          | Creatinine (0.50 – 2.50 mg/dL) | 1.20 ± 0.30         | 1.18 ± 0.27         | 0.871          |
| Lymphocyte (30 – 85 %)                                 | 42.00 ± 10.88    | 40.67 ± 10.80    | 0.766          | Total protein (5.4 – 7.5 g/dL) | 6.15 ± 1.04         | 6.22 ± 0.74         | 0.859          |
| RBC (5.00 – 8.00 × 10 <sup>6</sup> cells/μL)           | 5.66 ± 1.14      | 6.69 ± 0.68      | 0.014          | Albumin (2.7 – 5.0 g/dL)       | 3.51 ± 0.31         | 3.69 ± 0.24         | 0.120          |
| Hb (10.0 – 17.0 g/dL)                                  | 10.98 ± 2.46     | 12.86 ± 1.15     | 0.026          | ALT(SGPT) (45 – 80 U/L)        | 49.92 ± 29.72       | 45.25 ± 16.27       | 0.638          |
| MCV (58.0 – 67.0 fl)                                   | 60.87 ± 2.01     | 60.68 ± 2.47     | 0.837          | AST(SGOT) (35 – 130 U/L)       | 24.58 ± 11.30       | 25.17 ± 12.52       | 0.906          |
| MCH (20.0 – 21.3 pg)                                   | 19.34 ± 1.51     | 20.30 ± 3.72     | 0.418          | ALK.phos (12 – 96 U/L)         | 56.00 ± 24.63       | 46.50 ± 23.13       | 0.341          |
| MCHC (29.0 – 37.0 g/dL)                                | 31.76 ± 1.96     | 30.32 ± 5.04     | 0.366          | CPK (140.0 – 372.0 U/L)        | 1,688.44 ± 1,958.45 | 1,395.57 ± 1,457.18 | 0.682          |
| Platelets (250 – 650 × 10 <sup>3</sup> /μL)            | 429.83 ± 88.55   | 525.42 ± 123.12  | 0.040          | CRP (< 3 mg/L)                 | 0.18 ± 0.05         | 0.18 ± 0.05         | 0.695          |
| 8 weeks                                                | Group A (n = 6)  | Group B (n = 6)  | <i>p</i> value | 8 weeks                        | Group A (n = 6)     | Group B (n = 6)     | <i>p</i> value |
| WBC (5.20 – 12.50 × 10 <sup>3</sup> /mm <sup>3</sup> ) | 7.90 ± 2.16      | 6.13 ± 2.16      | 0.817          | BUN (20 - 45 mg/dL)            | 29.50 ± 4.89        | 27.67 ± 9.09        | 0.673          |
| Neutrophil (20 – 75%)                                  | 51.17 ± 9.83     | 48.50 ± 11.98    | 0.682          | Creatinine (0.50 – 2.50 mg/dL) | 1.17 ± 0.16         | 1.01 ± 0.23         | 0.186          |
| Lymphocyte (30 – 85 %)                                 | 44.33 ± 10.27    | 46.00 ± 12.13    | 0.803          | Total protein (5.4 – 7.5 g/dL) | 7.67 ± 0.45         | 6.77 ± 0.59         | 0.014          |
| RBC (5.00 – 8.00 × 10 <sup>6</sup> cells/μL)           | 6.82 ± 0.35      | 6.09 ± 0.97      | 0.112          | Albumin (2.7 – 5.0 g/dL)       | 4.25 ± 0.34         | 3.82 ± 0.33         | 0.049          |
| Hb (10.0 – 17.0 g/dL)                                  | 13.03 ± 0.58     | 11.17 ± 1.94     | 0.047          | ALT(SGPT) (45 – 80 U/L)        | 34.33 ± 11.24       | 38.17 ± 5.19        | 0.466          |
| MCV (58.0 – 67.0 fl)                                   | 61.60 ± 2.45     | 60.35 ± 2.04     | 0.360          | AST(SGOT) (35 – 130 U/L)       | 29.83 ± 16.52       | 15.50 ± 5.47        | 0.071          |
| MCH (20.0 – 21.3 pg)                                   | 19.15 ± 1.29     | 18.33 ± 1.11     | 0.267          | ALK.phos (12 – 96 U/L)         | 66.00 ± 35.94       | 58.00 ± 29.87       | 0.684          |
| MCHC (29.0 – 37.0 g/dL)                                | 31.07 ± 1.04     | 30.37 ± 1.31     | 0.330          | CPK (140.0 – 372.0 U/L)        | 619.40 ± 192.31     | 516.03 ± 243.08     | 0.433          |
| Platelets (250 – 650 × 10 <sup>3</sup> /μL)            | 372.17 ± 101.60  | 335.17 ± 136.14  | 0.605          | CRP (< 3 mg/L)                 | 0.22 ± 0.06         | 0.19 ± 0.06         | 0.412          |
| 12 weeks                                               | Group A (n = 4)  | Group B (n = 4)  | <i>p</i> value | 12 weeks                       | Group A (n = 4)     | Group B (n = 4)     | <i>p</i> value |
| WBC (5.20 – 12.50 × 10 <sup>3</sup> /mm <sup>3</sup> ) | 7.68 ± 2.52      | 7.18 ± 1.35      | 0.738          | BUN (20 - 45 mg/dL)            | 27.50 ± 4.51        | 35.75 ± 6.08        | 0.072          |
| Neutrophil (20 – 75%)                                  | 50.75 ± 11.62    | 52.25 ± 12.12    | 0.864          | Creatinine (0.50 – 2.50 mg/dL) | 1.26 ± 0.04         | 1.13 ± 0.25         | 0.327          |
| Lymphocyte (30 – 85 %)                                 | 45.75 ± 12.23    | 43.25 ± 12.63    | 0.786          | Total protein (5.4 – 7.5 g/dL) | 7.63 ± 0.37         | 7.23 ± 0.69         | 0.348          |
| RBC (5.00 – 8.00 × 10 <sup>6</sup> cells/μL)           | 6.53 ± 1.18      | 6.70 ± 0.53      | 0.796          | Albumin (2.7 – 5.0 g/dL)       | 4.28 ± 0.32         | 4.25 ± 0.24         | 0.904          |
| Hb (10.0 – 17.0 g/dL)                                  | 12.80 ± 1.76     | 13.08 ± 1.25     | 0.808          | ALT(SGPT) (45 – 80 U/L)        | 38.00 ± 6.48        | 34.75 ± 14.55       | 0.697          |
| MCV (58.0 – 67.0 fl)                                   | 62.50 ± 2.40     | 64.85 ± 3.25     | 0.289          | AST(SGOT) (35 – 130 U/L)       | 25.50 ± 6.61        | 20.00 ± 11.58       | 0.441          |
| MCH (20.0 – 21.3 pg)                                   | 19.73 ± 1.07     | 19.50 ± 0.81     | 0.748          | ALK.phos (12 – 96 U/L)         | 45.25 ± 21.69       | 73.00 ± 29.41       | 0.180          |
| MCHC (29.0 – 37.0 g/dL)                                | 28.28 ± 7.69     | 30.10 ± 0.34     | 0.652          | CPK (140.0 – 372.0 U/L)        | 654.80 ± 123.52     | 732.18 ± 419.32     | 0.735          |
| Platelets (250 – 650 × 10 <sup>3</sup> /μL)            | 376.75 ± 107.02  | 496.50 ± 0.125   | 0.106          | CRP (< 3 mg/L)                 | 0.18 ± 0.05         | 0.16 ± 0.01         | 0.440          |

**Supplement Table S6.** List of cytokines and receptors found in the chondrocyte sheets, chondrocyte sheet-cancellous bone tissues, and cancellous bones.

| No. | Accession number | Protein names                              | Example of term in biological process                         | Q-value | Log 2 expression  |                                          |                 |
|-----|------------------|--------------------------------------------|---------------------------------------------------------------|---------|-------------------|------------------------------------------|-----------------|
|     |                  |                                            |                                                               |         | Chondrocyte sheet | Chondrocyte sheet-cancellous bone tissue | Cancellous bone |
| 1   | Q8N8U9           | BMP-binding endothelial regulator protein  | regulation of pathway-restricted SMAD protein phosphorylation | 0.9785  | 0                 | 15.6278                                  | 0               |
| 2   | P36894           | BMP receptor type-1A                       | chondrocyte differentiation                                   | 0.9978  | 0                 | 15.5218                                  | 0               |
| 3   | Q9NSA1           | FGF 21                                     | cell-cell signaling                                           | 1.0119  | 0                 | 13.8124                                  | 0               |
| 4   | P08069           | IGF 1 receptor                             | positive regulation of PI3K signaling                         | 0.9925  | 0                 | 14.574                                   | 0               |
| 5   | P18065           | IGF-binding protein 2                      | cellular protein metabolic process                            | 0.9883  | 0                 | 11.8794                                  | 0               |
| 6   | Q16270           | IGF-binding protein 7                      | cellular protein metabolic process                            | 1.0022  | 14.1102           | 0                                        | 0               |
| 7   | Q14766           | Latent-TGF beta-binding protein 1          | regulation of TGF beta activation                             | 0.9973  | 18.9445           | 0                                        | 0               |
| 8   | Q14767           | Latent-TGF beta-binding protein 2          | TGF beta receptor signaling pathway                           | 0.9898  | 14.4353           | 13.0434                                  | 0               |
| 9   | Q9NS15           | Latent-TGF beta-binding protein 3          | TGF beta activation                                           | 0.9900  | 17.9842           | 12.9124                                  | 0               |
| 10  | Q9P0M4           | Interleukin-17C                            | inflammatory response                                         | 1.0171  | 0                 | 0                                        | 11.9861         |
| 11  | Q8NFM7           | Interleukin-17 receptor D                  | MAPK cascade                                                  | 1.0032  | 0                 | 0                                        | 10.9533         |
| 12  | Q9Y4K3           | TNF receptor-associated factor 6           | activation of MAPK activity                                   | 0.9929  | 19.8489           | 12.6466                                  | 0               |
| 13  | Q5GJ75           | TNF alpha-induced protein 8-like protein 3 | regulation of apoptotic process                               | 0.9930  | 0                 | 10.4257                                  | 0               |



**Supplement Table. S7.** List of cytokines and receptors found in the culture media of the chondrocyte sheets, chondrocyte sheet-cancellous bone tissues, and cancellous bones.

| No. | Accession number | Protein names                              | Example of GO term in biological process      | Q-value | Log 2 expression       |                                               |                      |
|-----|------------------|--------------------------------------------|-----------------------------------------------|---------|------------------------|-----------------------------------------------|----------------------|
|     |                  |                                            |                                               |         | DMEM Chondrocyte sheet | DMEM Chondrocyte sheet-cancellous bone tissue | DMEM Cancellous bone |
| 1   | Q8WU20           | FGF receptor substrate 2                   | FGF receptor signaling pathway                | 0.9590  | 0                      | 10.0451                                       | 11.6310              |
| 2   | Q92896           | Cysteine-rich FGF receptor                 | regulation of chondrocyte differentiation     | 1.0461  | 17.9439                | 0                                             | 0                    |
| 3   | P08069           | IGF 1 receptor                             | immune response                               | 0.9927  | 18.2857                | 16.8028                                       | 14.9464              |
| 4   | P29279           | CCN family member 2                        | cartilage condensation                        | 1.0231  | 16.8287                | 15.1766                                       | 14.1805              |
| 5   | Q16270           | IGF-binding protein 7                      | cellular protein metabolic process            | 0.9840  | 0                      | 14.3524                                       | 0                    |
| 6   | Q8WX77           | IGF-binding protein-like 1                 | regulation of cell growth                     | 0.9856  | 16.0886                | 13.1611                                       | 0                    |
| 7   | Q14627           | Interleukin-13 receptor subunit alpha-2    | cytokine-mediated signaling pathway           | 1.0042  | 0                      | 17.1431                                       | 16.4826              |
| 8   | Q9HB29           | Interleukin-1 receptor-like 2              | cellular response to cytokine stimulus        | 1.0221  | 0                      | 16.8606                                       | 0                    |
| 9   | Q5VWK5           | Interleukin-23 receptor                    | cytokine-mediated signaling pathway           | 1.0400  | 13.1289                | 13.8837                                       | 0                    |
| 10  | Q16552           | Interleukin-17A                            | cytokine-mediated signaling pathway           | 1.0244  | 17.1065                | 0                                             | 0                    |
| 11  | O95760           | Interleukin-33                             | interleukin-33-mediated signaling pathway     | 1.0060  | 14.3086                | 0                                             | 0                    |
| 12  | Q9NRM6           | Interleukin-17 receptor B                  | positive regulation of inflammatory response  | 1.0058  | 13.7460                | 0                                             | 0                    |
| 13  | Q9Y616           | Interleukin-1 receptor-associated kinase 3 | cytokine-mediated signaling pathway           | 0.9915  | 12.4758                | 0                                             | 17.8342              |
| 14  | Q13007           | Interleukin-24                             | apoptotic process                             | 0.9869  | 0                      | 0                                             | 15.1562              |
| 15  | Q13077           | TNF receptor-associated factor 1           | signal transduction                           | 1.0010  | 0                      | 14.1318                                       | 0                    |
| 16  | Q9UBN6           | TNF receptor superfamily member 10D        | signal transduction                           | 0.9920  | 0                      | 14.0133                                       | 0                    |
| 17  | O14763           | TNF receptor superfamily member 10B        | cell surface receptor signaling pathway       | 1.0488  | 12.4131                | 11.2207                                       | 12.3928              |
| 18  | P25942           | TNF receptor superfamily member 5          | cellular response to interleukin-1            | 0.9819  | 19.5426                | 20.0407                                       | 20.4257              |
| 19  | Q9Y6Q6           | TNF receptor superfamily member 11A        | cell-cell signaling                           | 0.9871  | 0                      | 15.3405                                       | 0                    |
| 20  | O14836           | TNF receptor superfamily member 13B        | hematopoietic progenitor cell differentiation | 1.0265  | 15.6382                | 0                                             | 0                    |
| 21  | Q9NP84           | TNF receptor superfamily member 12A        | angiogenesis                                  | 1.0108  | 11.4186                | 0                                             | 0                    |
| 22  | Q9HAV5           | TNF receptor superfamily member 27         | ectodermal cell differentiation               | 0.9871  | 0                      | 0                                             | 13.8164              |
